# Supplementary material for: Highly conductive three-dimensional metal organic frameworks from small in situ generated ligands
Source: Royal Society of Chemistry journal article supplement (doi:10.1039/d3ma00562c), 2023-01-01
Supplement: d3ma00562c1.pdf [file d3ma00562c1.pdf]

## Supporting Information

### Contents

Table S1: List of conductivity of some of the reported conductive MOFs in as-synthesized, guest-free and iodine-loaded forms

Figure S1: PXRD of **Mn-F**, **Co-F**, **Ni-F** and **Zn-F** MOF

Figure S2: M-O and C-O bond lengths of **Mn-F**, **Co-F** and **Zn-F**

Figure S3: FTIR spectra of **Mn-F**, **Co-F**, **Ni-F** and **Zn-F** MOFs

Figure S4: Calculated band gap (eV) of the MOFs.

Table S2: CO stretching frequency values after and before heating

Figure S5: FTIR spectra showing CO stretching frequency after and before heating for MOFs

Figure S6: Temperature dependent conductivity curves

Figure S7: TGA graph of **Mn-F** MOF

Figure S8: PXRD of (a) **Mn-F** and (b) **Co-F** MOF before and after heating

Figure S9: PXRD of **Ni-F** MOF before and after heating

Figure S10: SEM image of the **Co-F** pellet

Figure S11: Single crystal sizes of the MOFs

Figure S12: Optimized geometries of the Zn, Ni, Mn and Co containing Metal-Organic Frameworks.

Table S3: Crystallographic table

Table S1: List of conductivity of some of the reported conductive MOFs in assynthesized, guest-free and iodine-loaded forms.

| MOFs                                                                                              | Assynthesized/<br>solvated<br>Conductivity<br>(Scm <sup>-1</sup> ) | Guest-free/<br>desolvated<br>Conductivity<br>(Scm <sup>-1</sup> ) | I <sub>2</sub> loaded<br>conductivity<br>(Scm <sup>-1</sup> ) | Measurments  | E <sub>a</sub> (eV) | References |
|---------------------------------------------------------------------------------------------------|--------------------------------------------------------------------|-------------------------------------------------------------------|---------------------------------------------------------------|--------------|---------------------|------------|
| Co <sub>2</sub> (DOBDC)(DMF) <sub>2</sub>                                                         | -                                                                  | 1.5 × 10 <sup>-13</sup>                                           | -                                                             | 2-probe      | 0.58                | 1          |
| Ni <sub>2</sub> (DOBDC)(DMF) <sub>2</sub>                                                         | -                                                                  | 2.8 × 10 <sup>-14</sup>                                           | -                                                             | 2-probe      | 0.62                |            |
| Zn <sub>2</sub> (DOBDC)(DMF) <sub>2</sub>                                                         | -                                                                  | 3.3 × 10 <sup>-14</sup>                                           | -                                                             | 2-probe      | 0.54                |            |
| Mn <sub>2</sub> (DOBDC)(DMF) <sub>2</sub>                                                         | 3.9 × 10 <sup>-13</sup>                                            | 3.0 × 10 <sup>-13</sup>                                           | -                                                             | 2-probe      | 0.55                | 2          |
| Mn <sub>2</sub> (DSBDC)(DMF) <sub>2</sub>                                                         | 2.5 × 10 <sup>-12</sup>                                            | 1.2 × 10 <sup>-12</sup>                                           | -                                                             | 2-probe      | 0.81                | 3          |
| Cu [Ni(pdt) <sub>2</sub> ]                                                                        | -                                                                  | 1 × 10 <sup>-8</sup>                                              | 1 × 10 <sup>-4</sup>                                          | 2-probe      | -                   | 4          |
| [Co(ebic) <sub>2</sub> ] <sub>n</sub>                                                             | -                                                                  | 2.46 × 10 <sup>-9</sup>                                           | 2.21 × 10 <sup>-7</sup>                                       | -            | -                   | 5          |
| [Zn(ebic) <sub>2</sub> ] <sub>n</sub>                                                             | -                                                                  | 4.33 × 10 <sup>-9</sup>                                           | 3.47 × 10 <sup>-7</sup>                                       | -            | -                   |            |
| [Co <sub>1.5</sub> (bdc) <sub>1.5</sub> (H <sub>2</sub> bpz)]                                     | -                                                                  | 2.59 × 10 <sup>-9</sup>                                           | 1.56 × 10 <sup>-6</sup>                                       | 2-probe      | -                   | 6          |
| [Tb <sub>3</sub> (Cu <sub>4</sub> I <sub>4</sub> ) <sub>3</sub> (ina) <sub>9</sub> ] <sub>n</sub> | -                                                                  | 5.72 × 10 <sup>-11</sup>                                          | 2.16 × 10 <sup>-4</sup>                                       | -            | -                   | 7          |
| Cu <sub>3</sub> HIB <sub>2</sub>                                                                  | 13                                                                 | -                                                                 | -                                                             | 4-probe      | -                   | 8          |
| Ni <sub>3</sub> HIB <sub>2</sub>                                                                  | 8                                                                  | -                                                                 | -                                                             | 4-probe      | -                   |            |
| Ni <sub>3</sub> HTB <sub>2</sub>                                                                  | 0.15                                                               | -                                                                 | -                                                             | 2-probe      | -                   | 9          |
| Ni <sub>3</sub> HITP <sub>2</sub>                                                                 | 2                                                                  | -                                                                 | -                                                             | 2-probe      | -                   | 10         |
| [Cu <sub>3</sub> (C <sub>6</sub> S <sub>6</sub> ) <sub>n</sub> ]                                  | 1,580                                                              | -                                                                 | -                                                             | 4-probe      | 0.00206             | 11         |
| Cu <sub>3</sub> BHS                                                                               | 110                                                                | -                                                                 | -                                                             | 4-probe      | -                   | 12         |
| Cu <sub>3</sub> HHTP <sub>2</sub>                                                                 | 1.5                                                                | -                                                                 | -                                                             | 4-probe      | -                   | 13         |
| Cu-CAT-1                                                                                          | 0.18                                                               | -                                                                 | -                                                             | 4-point      | -                   | 14         |
| Ni <sub>3</sub> TTB <sub>2</sub>                                                                  | 0.1                                                                | -                                                                 | -                                                             | van der Pauw | 0.041               | 15         |
| [H <sub>2</sub> N(CH <sub>3</sub> ) <sub>2</sub> ][Mn(HCO <sub>2</sub> ) <sub>3</sub> ]           | 4.237x10 <sup>-1</sup>                                             | 5.279 x10 <sup>-1</sup>                                           | -                                                             | 2-probe      | 0.00731             | This work  |
| [H <sub>2</sub> N(CH <sub>3</sub> ) <sub>2</sub> ][Co(HCO <sub>2</sub> ) <sub>3</sub> ]           | 3.015 x10 <sup>-1</sup>                                            | 1.052 x10 <sup>-1</sup>                                           | -                                                             | 2-probe      | 0.01305             |            |
| [H <sub>2</sub> N(CH <sub>3</sub> ) <sub>2</sub> ][Ni(HCO <sub>2</sub> ) <sub>3</sub> ]           | 4.872 x10 <sup>-3</sup>                                            | 4.975 x10 <sup>-1</sup>                                           | -                                                             | 2-probe      | 0.01590             |            |
| [H <sub>2</sub> N(CH <sub>3</sub> ) <sub>2</sub> ][Zn(HCO <sub>2</sub> ) <sub>3</sub> ]           | 4.785 x10 <sup>-3</sup>                                            | 1.492 x10 <sup>-1</sup>                                           | -                                                             | 2-probe      | 0.01599             |            |

H<sub>2</sub>pdt = pyrazine- 2,3-dithiol, Hebic = 2-ethyl-1H-benzo[d]imidazole-5-carboxylic acid, H<sub>2</sub>bdc = benzene-1,4-dicarboxylic acid, bpz = 3,3,5,5-tetramethyl-4,4-bipyrazole, Hina = isonicotinic acid, DOBDC= 2,5-dioxybenzene-1,4-dicarboxylate, DSBDC= 2,5-disulfidobenzene-1,4-dicarboxylate, HIB= Hexaiminobenzene, HTB= Hexathiolbenzene, HITP=2,3,6,7,10,11-Hexamino-triphenylene, BHS= Benzenhexaselenolate, HHTP= 2,3,6,7,10,11-hexahydroxytriphenylene, CAT= Catecholate, TTB= triamino-trithiolbenzene, E<sub>a</sub> = activation energy.

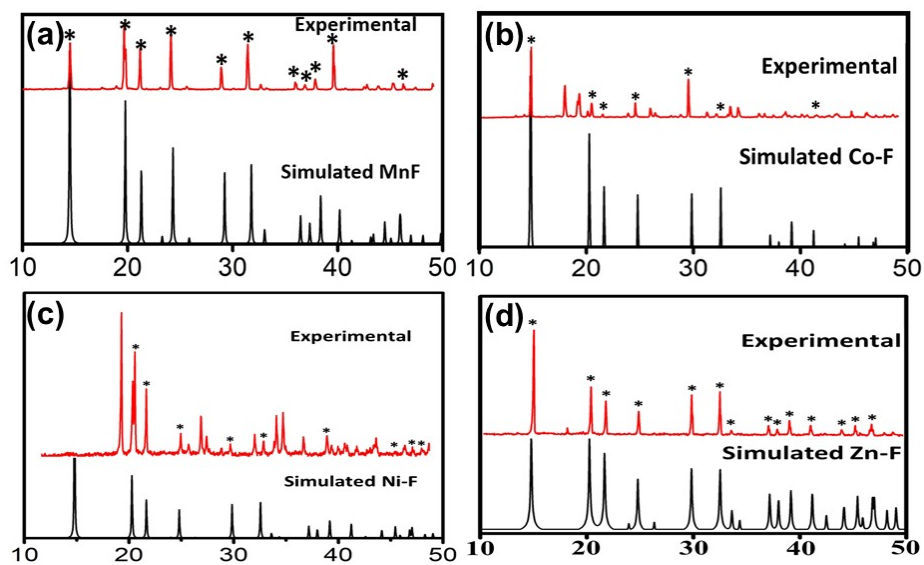

Fig S1: PXRD of (a) Mn-F, (b) Co-F, (c) Ni-F and (d) Zn-F MOFs; simulated (black) and experimental (red).

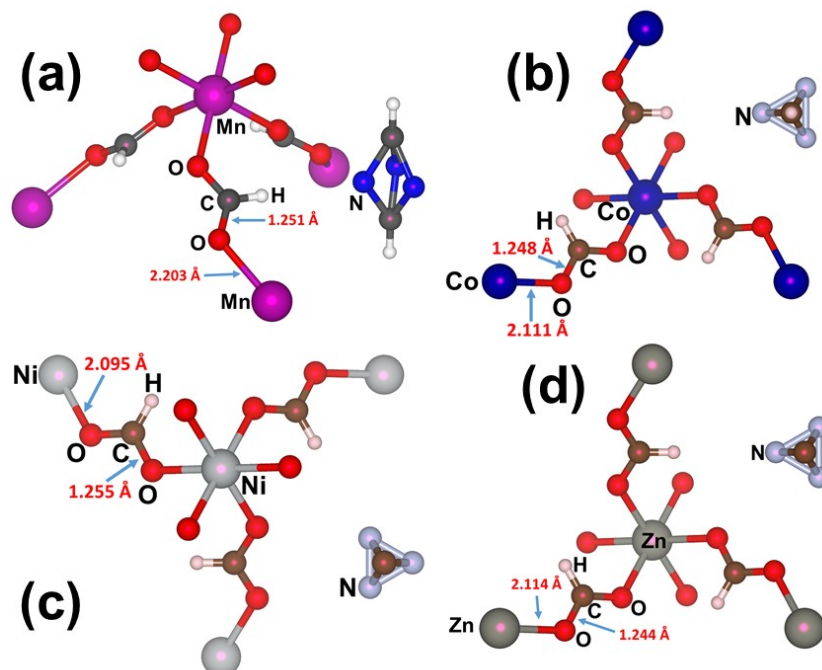

Fig S2: M-O and C-O bond lengths of (a) Mn-F, (b) Co-F, (c) Ni-F and (d) Zn-F.

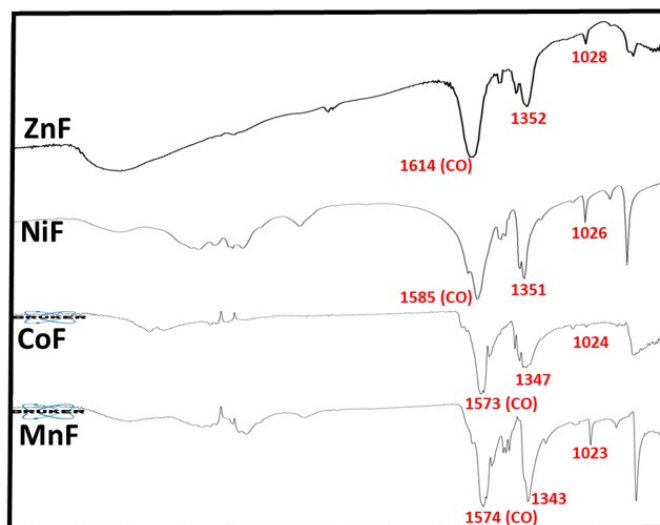

Fig S3: FTIR spectra of Mn-F, Co-F, Ni-F and Zn-F MOFs.

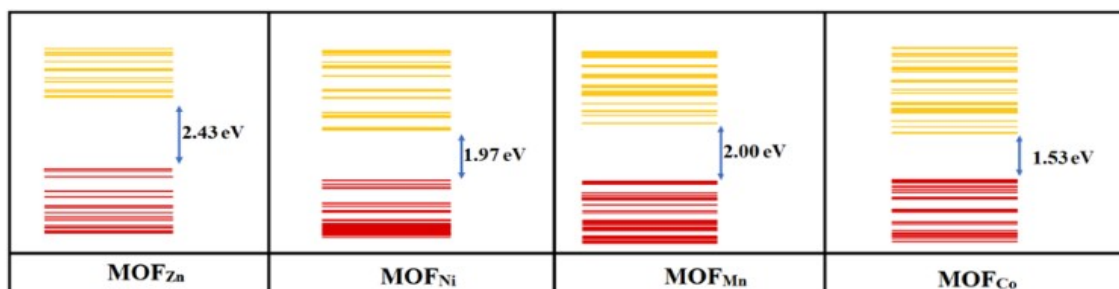

Fig S4: Calculated band gap (eV) of the MOFs.

Table S2: CO stretching frequency values of MOFs after and before heating.

| MOF  | Before heating, $\nu_{CO}$ in $cm^{-1}$ | After heating, $\nu_{CO}$ in $cm^{-1}$ |
|------|-----------------------------------------|----------------------------------------|
| Mn-F | 1574                                    | 1587                                   |
| Co-F | 1573                                    | 1585                                   |
| Ni-F | 1585                                    | 1587                                   |
| Zn-F | 1614                                    | 1630                                   |

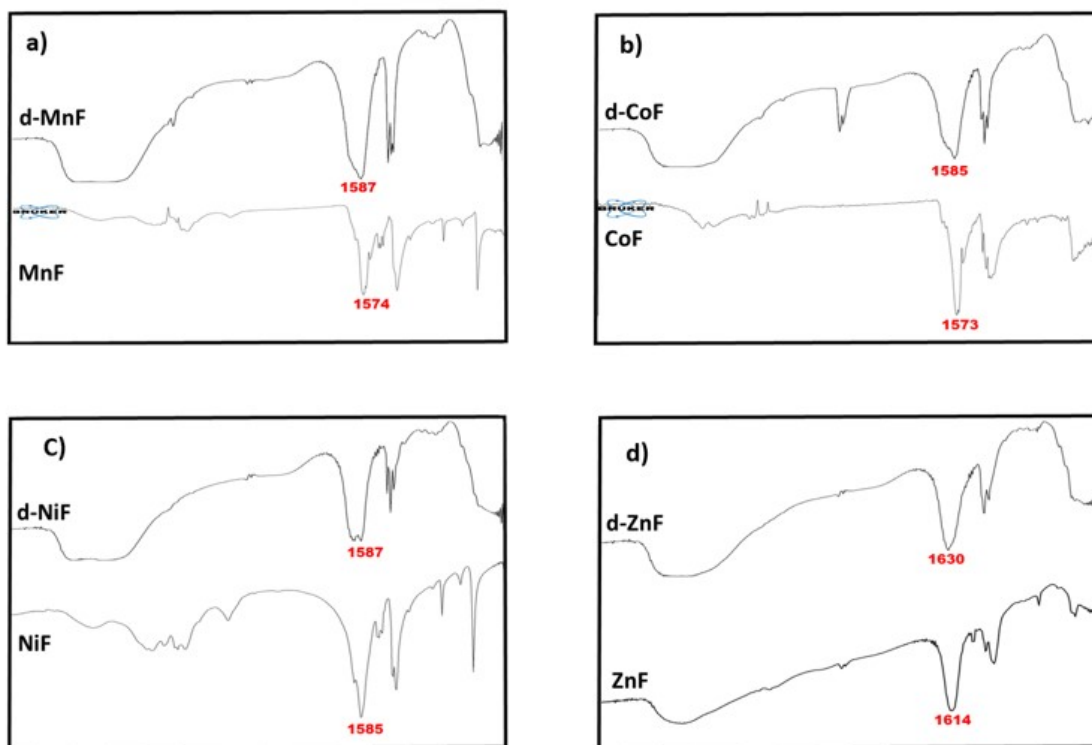

Figure S5: FTIR spectra C-O stretching frequencies before and after heating in (a) **Mn-F**, (b) **Co-F**, (c) **Ni-F** and (d) **Zn-F**.

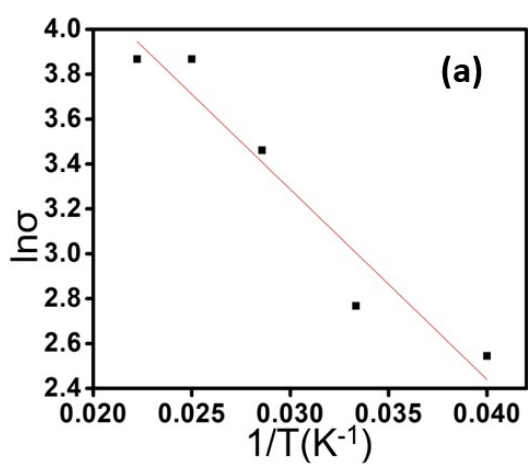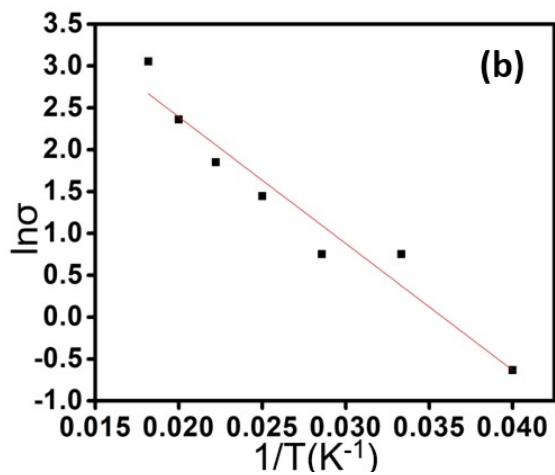

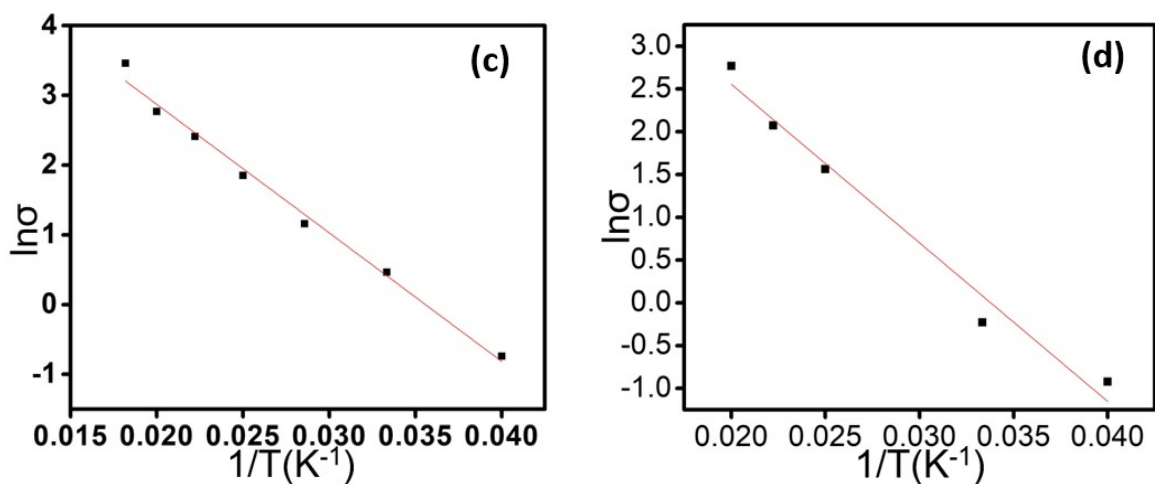

Fig

S6: Temperature dependent conductivity curve of (a) **Mn-F**, (b) **Co-F**, (c) **Ni-F** and (d) **Zn-F** MOFs.

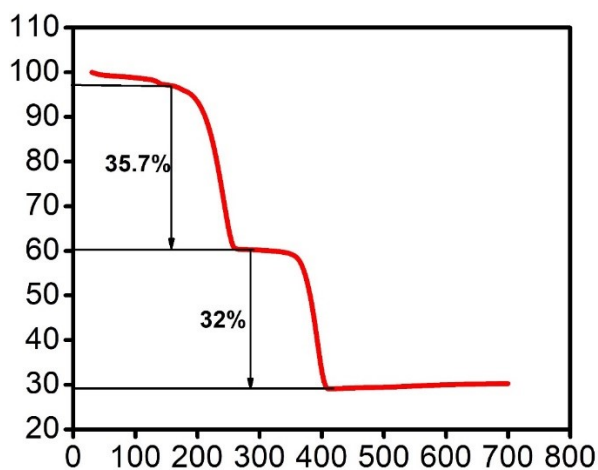

Fig S7: TGA graph of **Mn-F**.

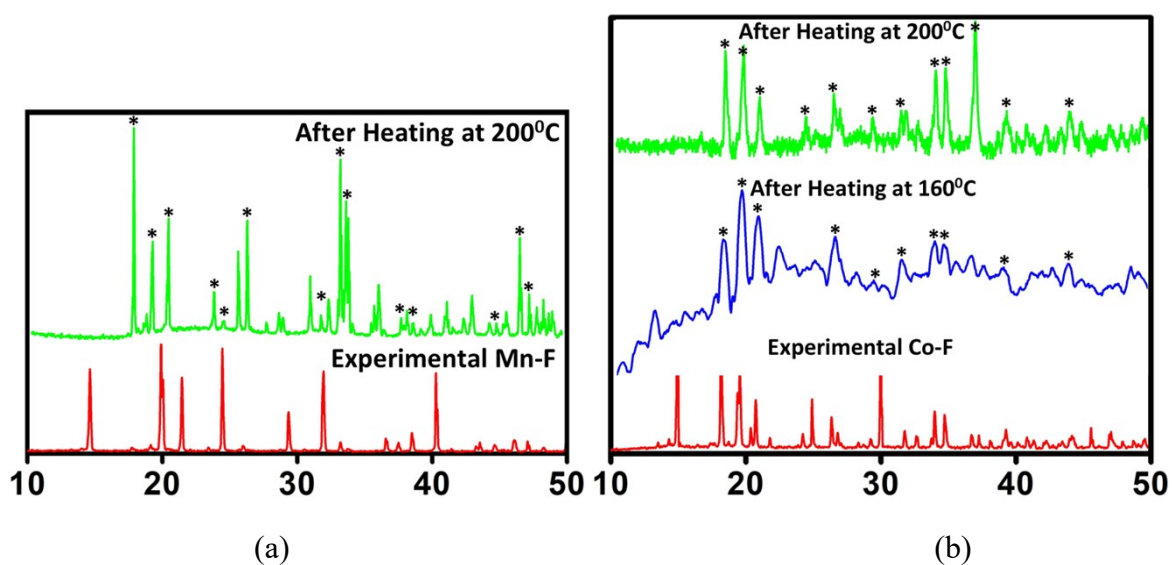

Fig S8: PXRD of (a) **Mn-F** and (b) **Co-F** before and after heating.

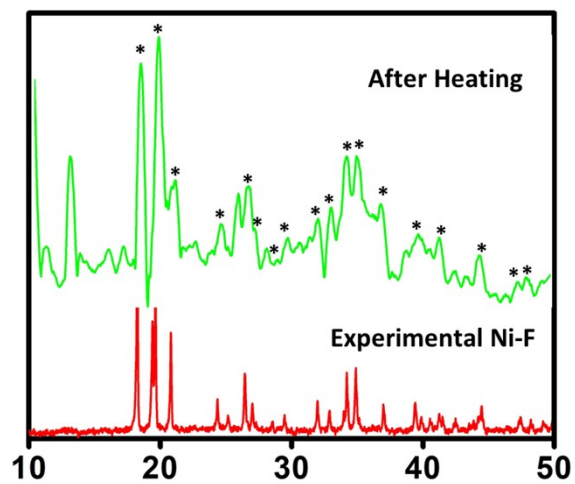

Fig S9: PXRD of Ni-F; simulated (black) and after heat (green) at 160 °C for 24 h.

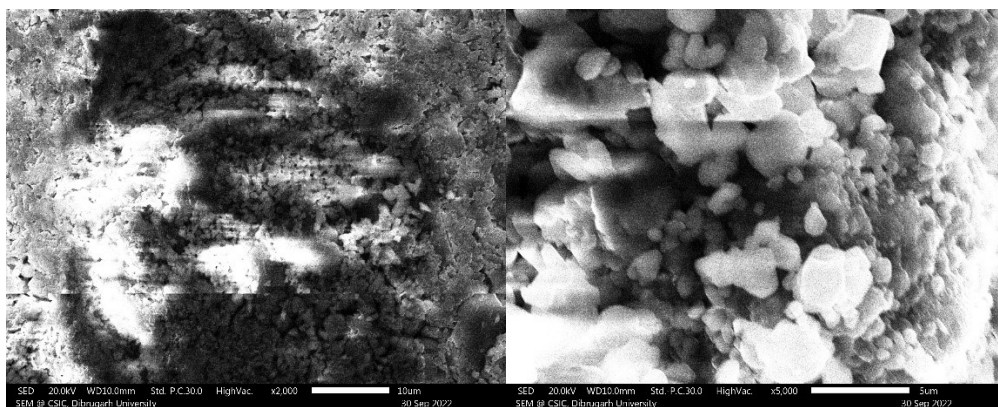

Figure S10: SEM image (2000X and 5000X) of the Co-F pellet.

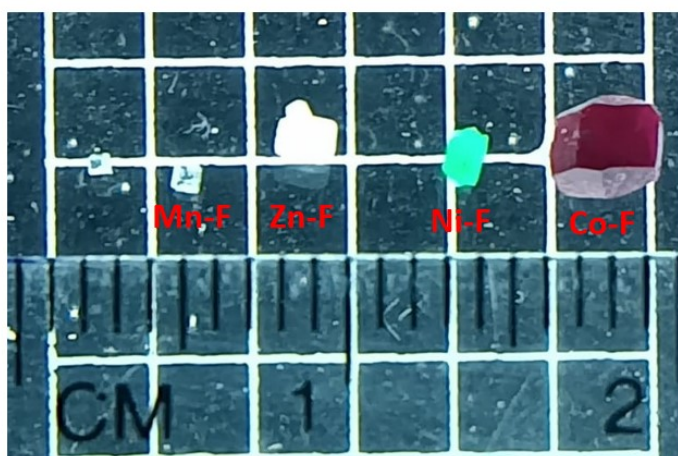

Fig S11: Single crystal images of the MOFs.

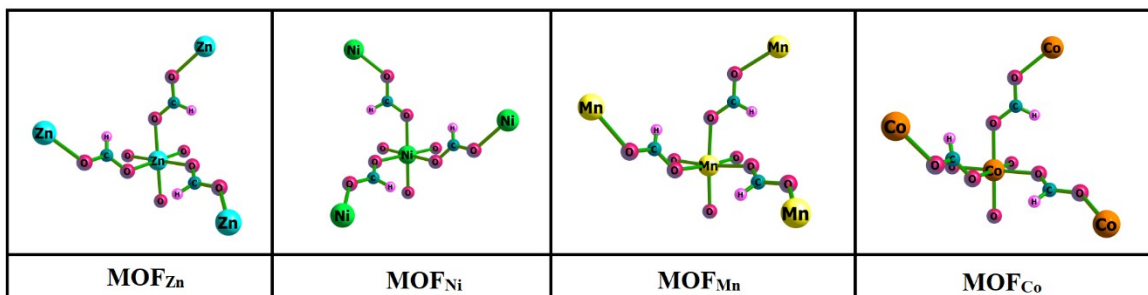

Fig S12: Optimized geometries of the Zn, Ni, Mn and Co containing Metal-Organic Frameworks.

Table S3: Crystallographic table

| Compound No.                  | Mn-F                                                                           | Co-F                                                                          | Zn-F                                                                          |
|-------------------------------|--------------------------------------------------------------------------------|-------------------------------------------------------------------------------|-------------------------------------------------------------------------------|
| Formulae                      | C <sub>15</sub> H <sub>15</sub> Mn <sub>3</sub> N <sub>9</sub> O <sub>18</sub> | C <sub>15</sub> H <sub>9</sub> Co <sub>3</sub> N <sub>9</sub> O <sub>18</sub> | C <sub>15</sub> H <sub>9</sub> N <sub>9</sub> O <sub>18</sub> Zn <sub>3</sub> |
| Mol. wt.                      | 774.18                                                                         | 774.10                                                                        | 799.48                                                                        |
| CCDC No                       | 2263898                                                                        | 2263917                                                                       | 2263916                                                                       |
| Crystal system                | Trigonal                                                                       | Trigonal                                                                      | Trigonal                                                                      |
| Space group                   | <i>R-3c</i>                                                                    | <i>R-3c</i>                                                                   | <i>R-3c</i>                                                                   |
| Temperature (K)               | 298 (2)                                                                        | 293(2)                                                                        | 293(2)                                                                        |
| Wavelength (Å)                | 0.71073                                                                        | 0.71073                                                                       | 0.71073                                                                       |
| <i>a</i> (Å)                  | 8.3840(16)                                                                     | 8.1984(6)                                                                     | 8.1966(4)                                                                     |
| <i>b</i> (Å)                  | 8.3840(16)                                                                     | 8.1984(6)                                                                     | 8.1966(4)                                                                     |
| <i>c</i> (Å)                  | 23.021(6)                                                                      | 22.2560(17)                                                                   | 22.280(2)                                                                     |
| $\alpha$ (°)                  | 90.00                                                                          | 90.00                                                                         | 90.00                                                                         |
| $\beta$ (°)                   | 90.00                                                                          | 90.00                                                                         | 90.00                                                                         |
| $\gamma$ (°)                  | 120.00                                                                         | 120.00                                                                        | 120.00                                                                        |
| <i>V</i> (Å <sup>3</sup> )    | 1295.50(17)                                                                    | 1295.50(17)                                                                   | 1296.32(15)                                                                   |
| <i>Z</i>                      | 2                                                                              | 2                                                                             | 2                                                                             |
| Density/gcm <sup>-3</sup>     | 1.897                                                                          | 1.984                                                                         | 2.048                                                                         |
| Abs. Coeff. /mm <sup>-1</sup> | 1.428                                                                          | 1.447                                                                         | 2.884                                                                         |
| Abs. correction               | none                                                                           | none                                                                          | none                                                                          |
| F(000)                        | 768                                                                            | 672                                                                           | 792                                                                           |



|                                |                                                                            |                                                                        |                                                                        |
|--------------------------------|----------------------------------------------------------------------------|------------------------------------------------------------------------|------------------------------------------------------------------------|
| Total no. of reflections       | 279                                                                        | 268                                                                    | 267                                                                    |
| Reflections, $I > 2\sigma(I)$  | 277                                                                        | 267                                                                    | 263                                                                    |
| Max. $2\theta$ ( $^\circ$ )    | 25.24                                                                      | 25.21                                                                  | 25.13                                                                  |
| Ranges (h, k, l)               | -10 $\leq$ h $\leq$ 10<br>-10 $\leq$ k $\leq$ 10<br>-27 $\leq$ l $\leq$ 27 | -9 $\leq$ h $\leq$ 9<br>-9 $\leq$ k $\leq$ 9<br>-26 $\leq$ l $\leq$ 26 | -9 $\leq$ h $\leq$ 9<br>-9 $\leq$ k $\leq$ 9<br>-25 $\leq$ l $\leq$ 26 |
| Completeness to $2\theta$ (%)  | 0.976                                                                      | 1.000                                                                  | 1.000                                                                  |
| Data/ Restraints / Parameters  | 279/0/ 28                                                                  | 268/0/ 25                                                              | 267/0/ 25                                                              |
| Goof ( $F^2$ )                 | 1.262                                                                      | 1.168                                                                  | 1.065                                                                  |
| R indices [ $I > 2\sigma(I)$ ] | 0.0729                                                                     | 0.0553                                                                 | 0.0750                                                                 |
| R indices (all data)           | 0.0730                                                                     | 0.0552                                                                 | 0.0755                                                                 |

## References

- 1 L. Sun, C. H. Hendon, S. S. Park, Y. Tulchinsky, R. Wan, F. Wang, A. Walsh and M. Dinca, *Chem. Sci.*, 2017, **8**, 4450-4457.
- 2 L. Sun, C. H. Hendon, M. A. Minier, A. Walsh and M. Dinca, *J. Am. Chem. Soc.*, 2015, **137**, 6164-6167.
- 3 L. Sun, T. Miyakai, S. Seki and M. Dinca, *J. Am. Chem. Soc.*, 2013, **135**, 8185.
- 4 Y. Kobayashi, B. Jacobs, M. D. Allendorf and J. R. Long, *Chem. Mater.*, 2010, **22**, 4120-4122.
- 5 F. Yu, D. D. Li, L. Cheng, Z. Yin, M. H. Zeng and M. Kurmoo, *Inorg. Chem.*, 2015, **54**, 1655-1660.
- 6 G. P. Li, K. Zhang, H.Y. Zhao, L. Hou and Y. Y. Wang, *ChemPlusChem*, 2017, **82**, 716-720.
- 7 Y. Q. Hu, M. Q. Li, Y. Wang, T. Zhang, P. Q. Liao, Z. Zheng, X. M. Chen and Y. Z. Zheng, *Chem. Eur. J.* 2017, **23**, 8409-8413.

- 8 J. H. Dou, L. Sun, Y. Ge, W. Li, C. H. Hendon, J. Li, S. Gul, J. Yano, E. A. Stach and M. Dinca, *J. Am. Chem. Soc.*, 2017, **139**, 13608-13611.
- 9 T. Kambe, R. Sakamoto, K. Hoshiko, K. Takada, M. Miyachi, J. H. Ryu, S. Sasaki, J. Kim, K. Nakazato and M. Takata, *J. Am. Chem. Soc.*, 2013, **135**, 2462-2465.
- 10 D. Sheberla, L. Sun, M. A. Blood-Forsythe, S. Er, C. R. Wade, C. K. Brozek, A. Aspuru-Guzik and M. Dinca, *J. Am. Chem. Soc.*, 2014, **136**, 8859-8862.
- 11 X. Huang, P. Sheng, Z. Tu, F. Zhang, J. Wang, H. Geng, Y. Zou, C. Di, Y. Yi, Y. Sun, W. Xu and D. Zhu, *Nat. Commun.*, 2015, **6**, 7408.
- 12 Y. Cui, J. Yan, Z. Chen, J. Zhang, Y. Zou, Y. Sun, W. Xu and D. Zhu, *Adv. Sci.*, 2019, **6**, 1802235.
- 13 R.W. Day, D.K. Bediako, M. Rezaee, L.R. Parent, G. Skorupskii, M. Q. Arguilla, C. H. Hendon, I. Stassen, N. C. Gianneschi, P. Kim and M. Dincă, *ACS Cent. Sci.*, 2019, **5**, 1959-1964.
- 14 M. Hmadeh, Z. Lu, Z. Liu, F. Gándara, H. Furukawa, S. Wan, V. Augustyn, R. Chang, L. Liao and F. Zhou, *Chem. Mater.*, 2012, **24**, 3511– 3513.
- 15 X. Sun, K. H. Wu, R. Sakamoto, T. Kusamoto, H. Maeda, X. Ni, W. Jiang, F. Liu, S. Sasaki, H. Masunaga and H. Nishihara, *Chem. Sci.*, 2017, **8**, 8078–8085.
